# Supplementary material for: α-Amido Trifluoromethyl Xanthates: A New Class of RAFT/MADIX Agents
Source: MDPI journal article supplement (doi:10.3390/molecules29102174), 2024-05-07

# SUPPLEMENTARY MATERIAL

## $\alpha$ -Amido Trifluoromethyl Xanthates: a New Class of RAFT/MADIX Agents

Mathias Destarac <sup>1,2,\*</sup>, Juliette Ruchmann-Sternchuss <sup>2</sup>, Eric Van Gramberen,<sup>2</sup> Xavier Vila<sup>3</sup> and Samir Z. Zard <sup>3,\*</sup>

<sup>1</sup> Laboratoire Softmat, Université de Toulouse, CNRS UMR 5623, Université Toulouse III-Paul Sabatier Sabatier, 31062 Toulouse, France

<sup>2</sup> Rhodia Opérations, Centre de Recherches et Technologies d'Aubervilliers, 93308 Aubervilliers, France

<sup>3</sup> Laboratoire de Synthèse Organique associé au C.N.R.S., UMR 7652, Ecole Polytechnique, 91128 Palaiseau, France

\* Correspondence: [mathias.destarac@univ-tlse3.fr](mailto:mathias.destarac@univ-tlse3.fr); [samir.zard@polytechnique.edu](mailto:samir.zard@polytechnique.edu).

**Table S1.** Data used to determine transfer constants to xanthates  $C_{tr}$  (X) in RAFT/MADIX polymerization of styrene in bulk at 110°C (self-initiation).

| Entry | Xanthate | [St] <sub>0</sub> /[X] <sub>0</sub> | t (min) | Conv (%) | $M_n$ (g/mol) | $\bar{D}$ |
|-------|----------|-------------------------------------|---------|----------|---------------|-----------|
| 1     | 9        | 41                                  | 90      | 11.9     | 2060          | 2.10      |
| 2     |          | 80                                  | 90      | 10.1     | 3550          | 2.17      |
| 3     |          | 120                                 | 90      | 13.0     | 4680          | 2.26      |
| 4     |          | 197                                 | 90      | 12.1     | 6960          | 2.35      |
| 5     | 10       | 39                                  | 45      | 12.8     | 1700          | 1.85      |
| 6     |          | 76                                  | 60      | 8.4      | 2680          | 2.08      |
| 7     |          | 96                                  | 45      | 4.3      | 3560          | 2.24      |
| 8     |          | 151                                 | 45      | 7.9      | 4610          | 2.29      |
| 9     | 11       | 38                                  | 45      | 9.7      | 1980          | 1.85      |
| 10    |          | 74                                  | 60      | 11.1     | 3420          | 2.11      |
| 11    |          | 131                                 | 45      | 4.8      | 5420          | 2.21      |
| 12    |          | 160                                 | 45      | 8.1      | 6360          | 2.17      |
| 13    | 13       | 38                                  | 30      | 1.0      | 980           | 1.43      |
| 14    |          | 82                                  | 30      | 1.2      | 1730          | 1.68      |
| 15    |          | 120                                 | 30      | 1.3      | 2440          | 1.88      |
| 16    |          | 178                                 | 30      | 0.9      | 3800          | 2.10      |

**Figure S1.** Mayo plot for the determination of chain transfer constant to xanthate **9** in styrene polymerization. Conditions of Table S1 (entries 1-4).

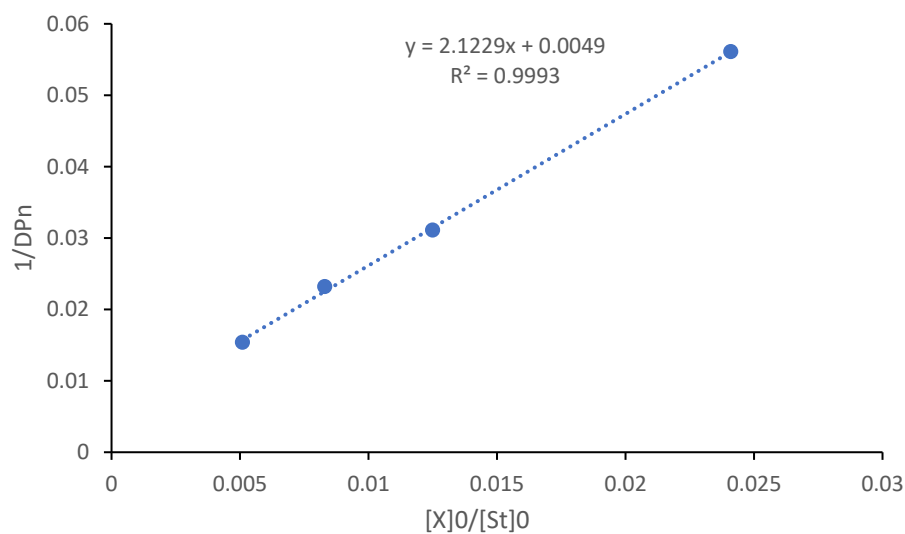

**Figure S2.** Mayo plot for the determination of chain transfer constant to xanthate **10** in styrene polymerization. Conditions of Table S1 (entries 5-8).

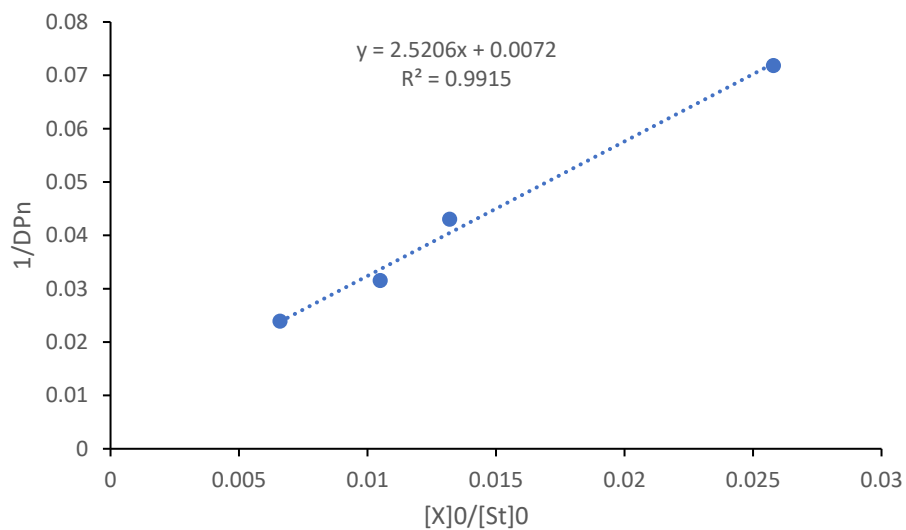

**Figure S3.** Mayo plot for the determination of chain transfer constant to xanthate **11** in styrene polymerization. Conditions of Table S1 (entries 9-12).

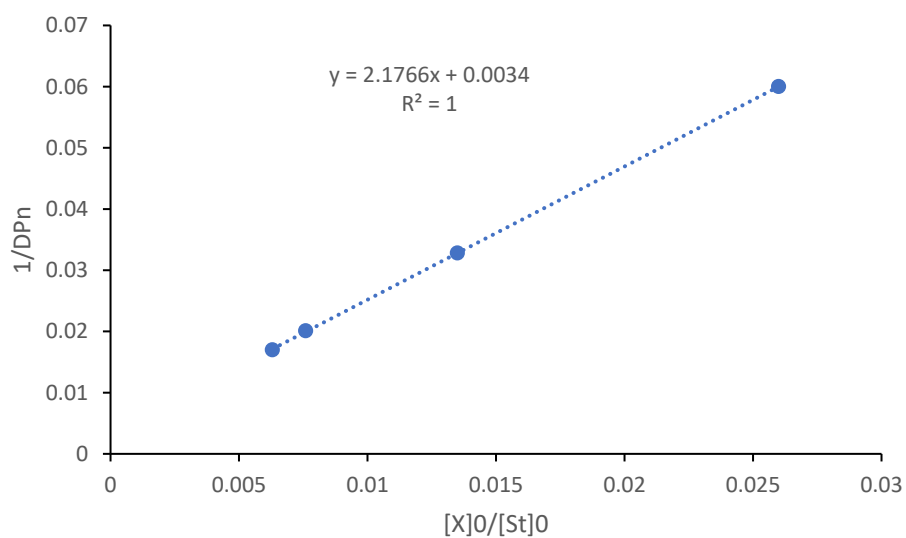

**Figure S4.** Mayo plot for the determination of chain transfer constant to xanthate **13** in styrene polymerization. Conditions of Table S1 (entries 13-16).

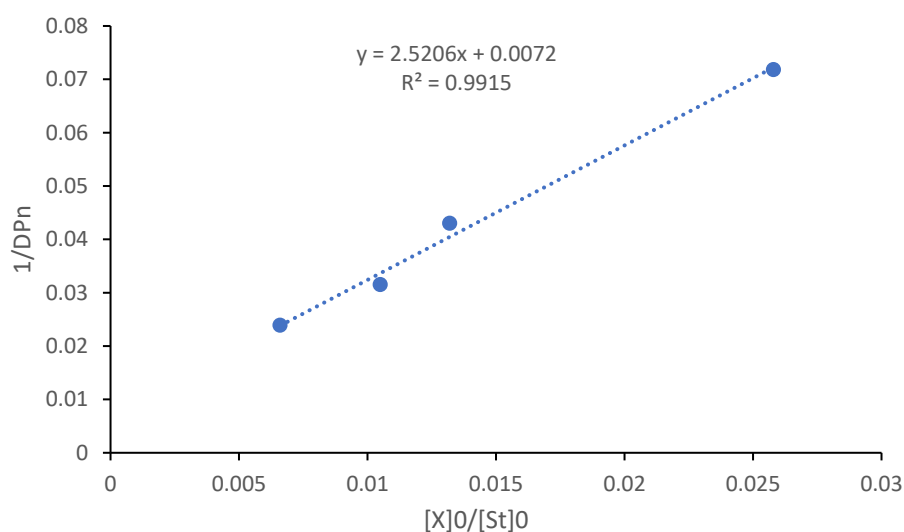

**Table S2.** **13**- and **14**-mediated RAFT/MADIX polymerization of styrene at 110°C (self-initiation).  $[St]_0/[X]_0=80$ .

| Entry | Xanthate  | t (h) | Conv (%) | $M_n$ (g/mol) | $M_{n\ th}$ (g/mol) | $\bar{D}$ |
|-------|-----------|-------|----------|---------------|---------------------|-----------|
| 1     | <b>13</b> | 0.5   | 0.8      | 2060          | 387                 | 1.69      |
| 2     |           | 1     | 3.4      | 3550          | 601                 | 1.75      |
| 3     |           | 2     | 9.6      | 4680          | 1119                | 1.87      |
| 4     |           | 5     | 28.3     | 6960          | 2690                | 2.29      |
| 5     |           | 24    | 96.0     | 8220          | 8361                | 2.39      |
| 6     | <b>14</b> | 1     | 4.12     | 1190          | 658                 | 1.69      |
| 7     |           | 2     | 12.1     | 1470          | 1323                | 1.80      |
| 8     |           | 5     | 25.8     | 2570          | 2461                | 1.92      |
| 9     |           | 24    | 85.0     | 6700          | 7393                | 1.49      |

**Figure S5.** An example of SEC chromatograms during St polymerization in the presence of PSt-14, for a given  $[BPO]_0$  at 80°C. Plotting  $\ln(S/S_0)$  as a function of time gives access to  $k_{act}$ .

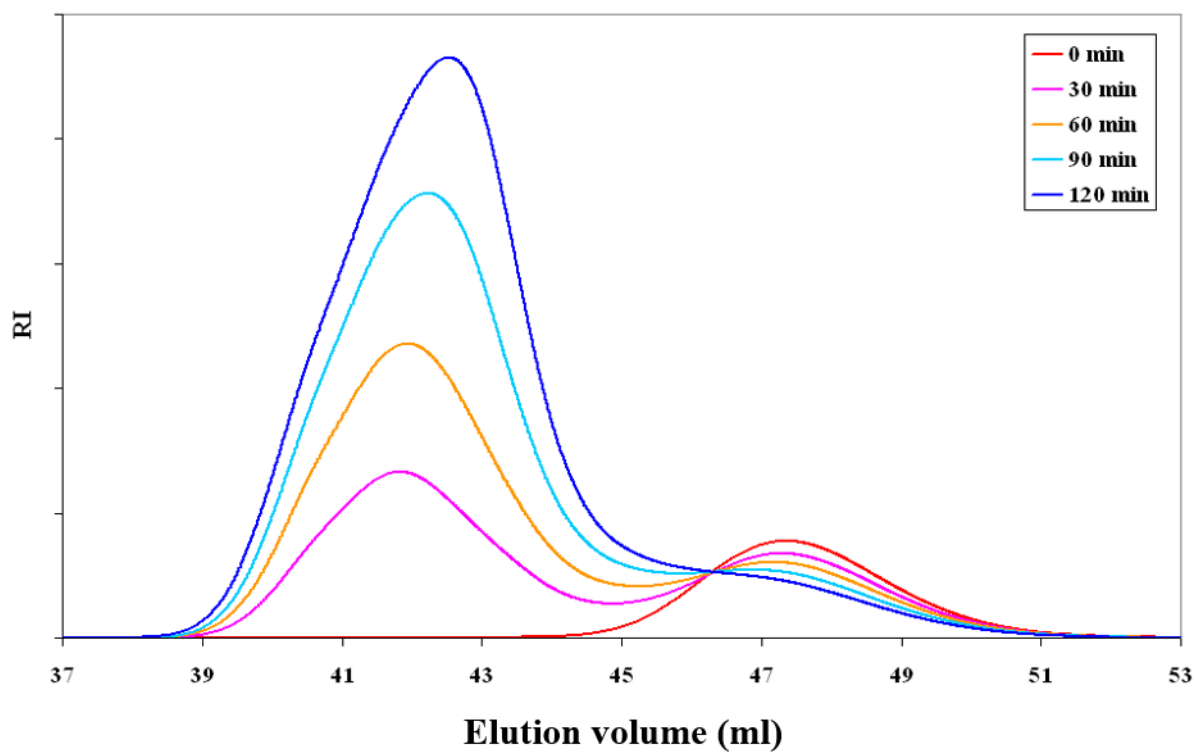

Supplement: s1 [file s1]
